# Supplementary material for: Selective Oxidation of Halophenols Catalyzed by an Artificial Miniaturized Peroxidase
Source: Int J Mol Sci. 2023 Apr 29;24(9):8058. doi: 10.3390/ijms24098058 (PMC10178546; doi:10.3390/ijms24098058)
Supplement: Supplementary file 1 [file ijms-24-08058-s001.zip › ijms-2338925-supplementary.pdf]

## SUPPORTING INFORMATION

# Selective oxidation of halophenols catalyzed by an artificial miniaturized peroxidase

*Daniele D'Alonzo, Maria De Fenza, Vincenzo Pavone, Angela Lombardi and Flavia Nastri\**

Department of Chemical Sciences, University of Napoli Federico II, Via Cintia, 80126 Napoli, Italy

[flavia.nastri@unina.it](mailto:flavia.nastri@unina.it)

### Table of Contents

**Figure S1.** EI-MS analysis of the reaction product of the Fe-MC6\*a-catalyzed 4-FP oxidation.

**Figure S2.** Fe-MC6\*a-catalyzed 4-CP oxidation: <sup>1</sup>H NMR spectrum of the reaction mixture.

**Figure S3.** UV-Vis spectral profiles of 4-CP and the corresponding dimeric and trimeric species.

**Figure S4.** Fe-MC6\*a-catalyzed 4-CP oxidation: ESI-MS spectrum of the dimeric compound.

**Figure S5.** Fe-MC6\*a-catalyzed 4-CP oxidation: ESI-MS spectrum of the trimeric compound.

**Figure S6.** <sup>1</sup>H NMR spectrum of compound **1a**.

**Figure S7.** <sup>1</sup>H NMR spectrum of compound **1b**.

**Figure S8.** <sup>13</sup>C NMR spectrum of compound **1b**.

**Figure S9.** UHPLC profiles of compounds **1a** and **1b**.

**Figure S10.** Fe-MC6\*a-catalyzed 4-BP oxidation: UHPLC profile of the reaction mixture.

**Figure S11.** Fe-MC6\*a-catalyzed 4-IP oxidation: UHPLC profile of the reaction mixture.

**Figure S12.** Fe-MC6\*a-catalyzed 4-CP oxidation: MALDI spectrum of the insoluble products.

**Figure S13.** Fe-MC6\*a-catalyzed 4-CP oxidation: GC analysis.

**Figure S14.** Fe-MC6\*a-catalyzed 4-CP oxidation in the presence of DMPO: GC analysis.

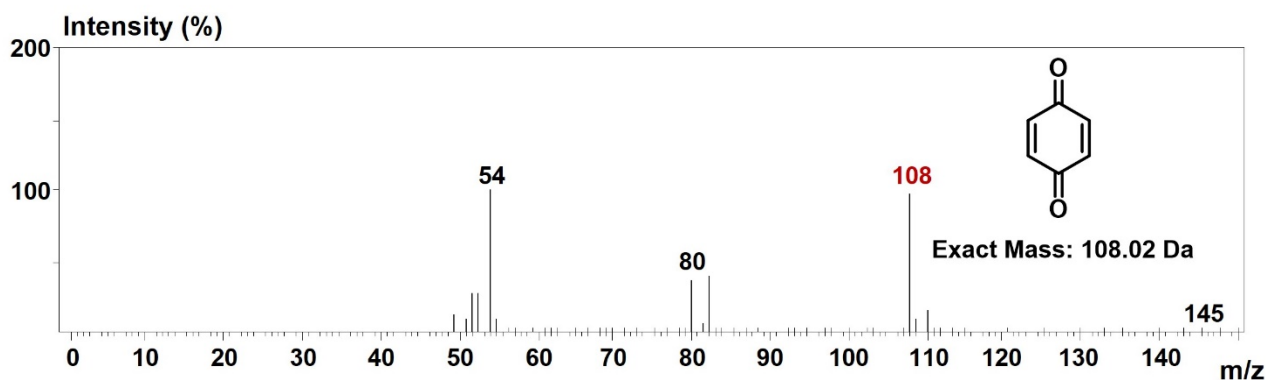

**Figure S1.** EI-MS analysis of the product obtained by the Fe-MC6\*a-catalyzed 4FP oxidation in the presence of H<sub>2</sub>O<sub>2</sub>.

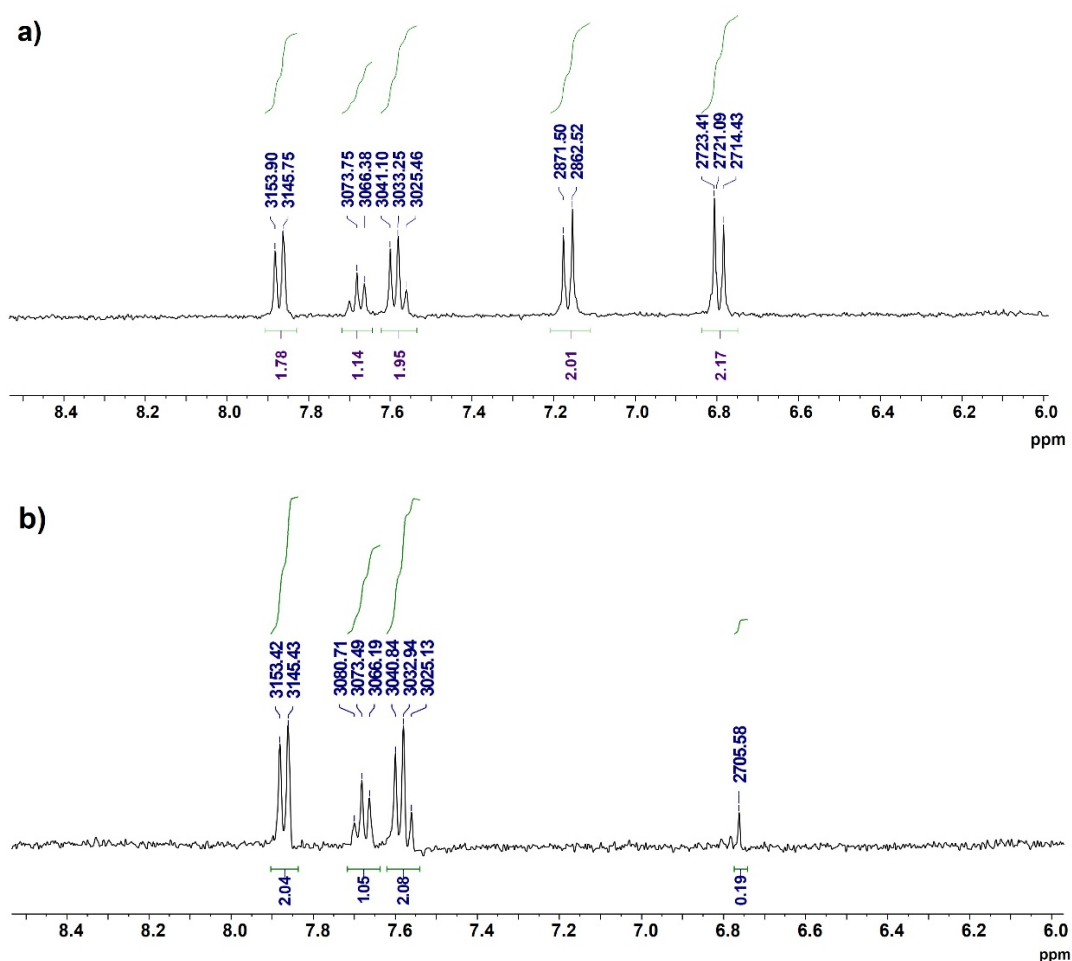

**Figure S2.** Close up views of the <sup>1</sup>H NMR spectra referred to the Fe-MC6\*a-catalyzed 4-CP oxidation. Spectra were acquired at (a) t = 0 min and (b) t = 30 min from H<sub>2</sub>O<sub>2</sub> addition. Reaction solvent was composed of phosphate buffer (50 mM), TFE and D<sub>2</sub>O (40:50:10 v/v/v).

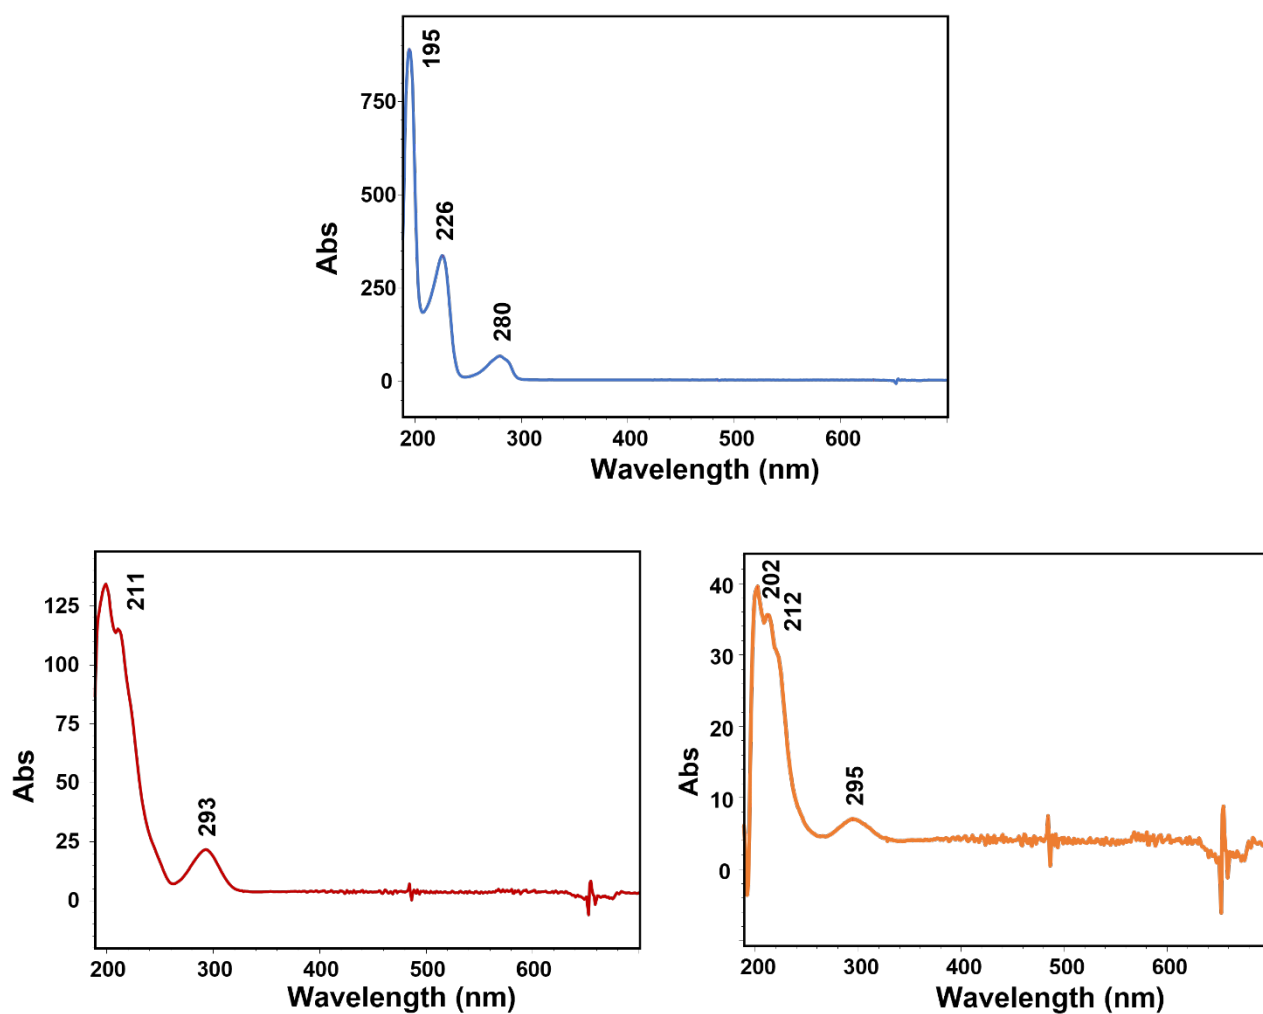

**Figure S3.** UV-Vis spectral profiles of the following products running in the UHPLC chromatogram (Figure 6): 4-CP (light blue curve, peak at  $R_t = 14.0$  min), trimeric compound (dark red curve, peak at  $R_t = 21.8$  min) and dimeric compound (orange curve, peak at  $R_t = 29.3$  min).

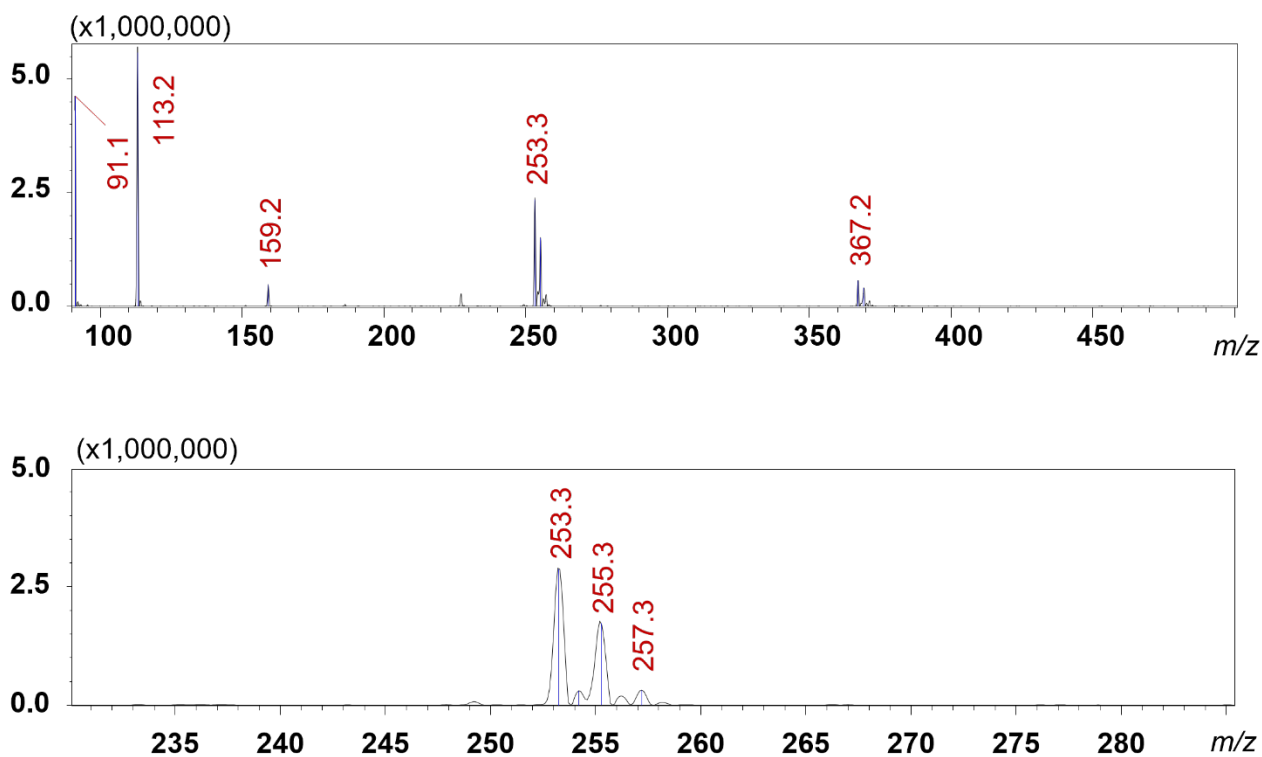

**Figure S4.** ESI-MS spectrum (negative ion mode, extracted from LC-MS analysis, peak at  $R_t = 29.3$  min) of the dimeric compound obtained during 4-CP oxidation. The peak at  $m/z = 253.3$  is referred to the molecular ion ( $[M-H]^-$ ). In addition, peaks at  $m/z = 255$  ( $[M-H+2]^-$ ) and at  $m/z = 257.3$  ( $[M-H+4]^-$ ) are indicative of the presence of two chlorine atoms.

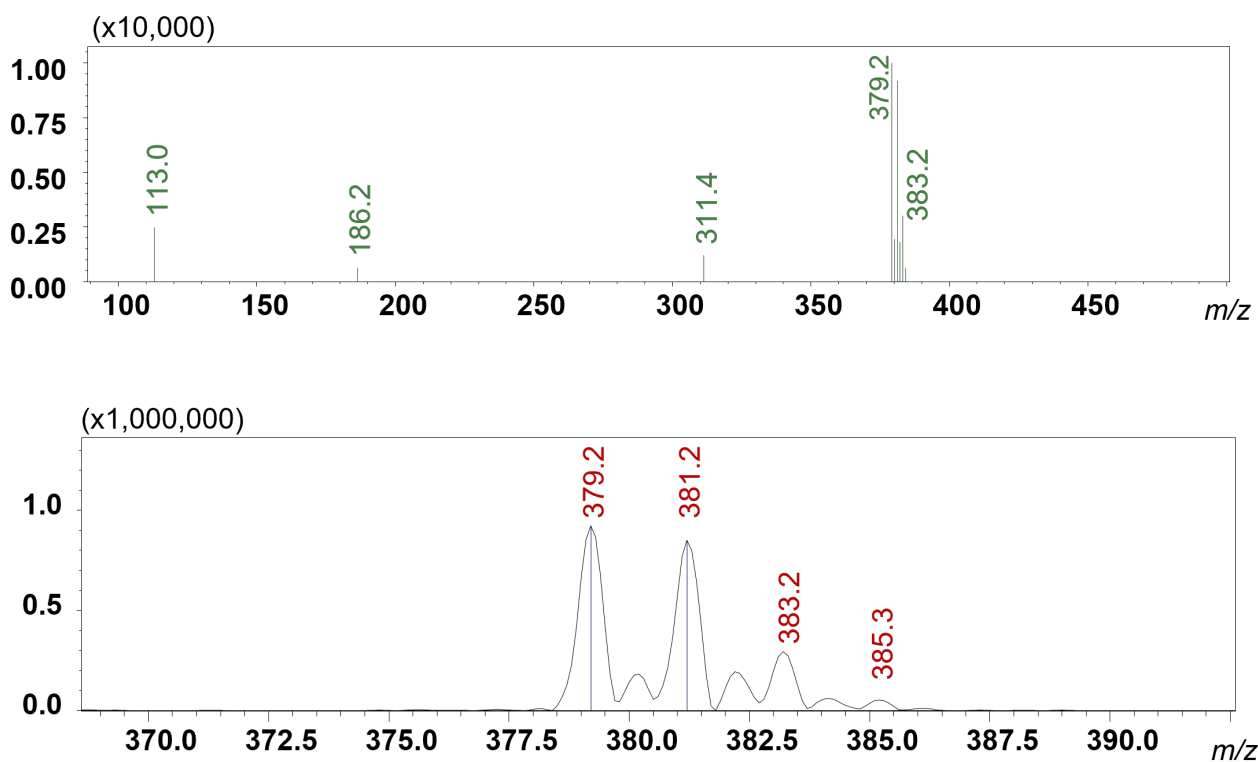

**Figure S5.** ESI-MS spectrum (negative ion mode, extracted from LC-MS analysis, peak at  $R_t = 21.8$  min) of the trimeric compound obtained during 4-CP oxidation. The peak at  $m/z = 379.2$  is referred to the molecular ion ( $[M - H]^-$ ). In addition, peaks at  $m/z = 381.2$  ( $[M-H+2]^-$ ),  $m/z = 383.2$  ( $[M-H+4]^-$ ) and  $m/z = 385.3$  ( $[M-H+6]^-$ ) indicate the presence of three chlorine atoms.

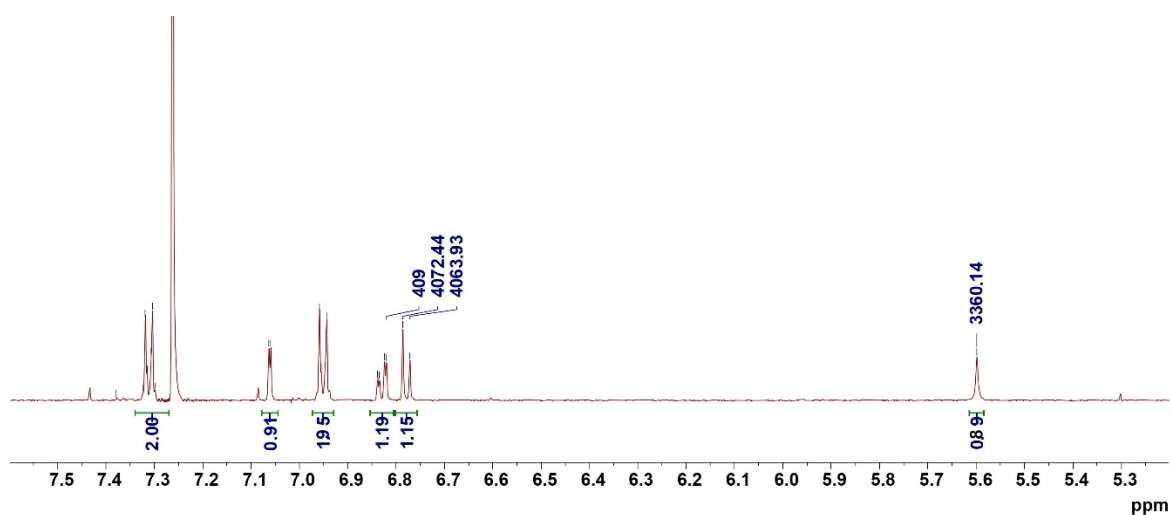

**Figure S6.** Close up view of the <sup>1</sup>H NMR spectrum of compound **1a** (CDCl<sub>3</sub>, 600 MHz).

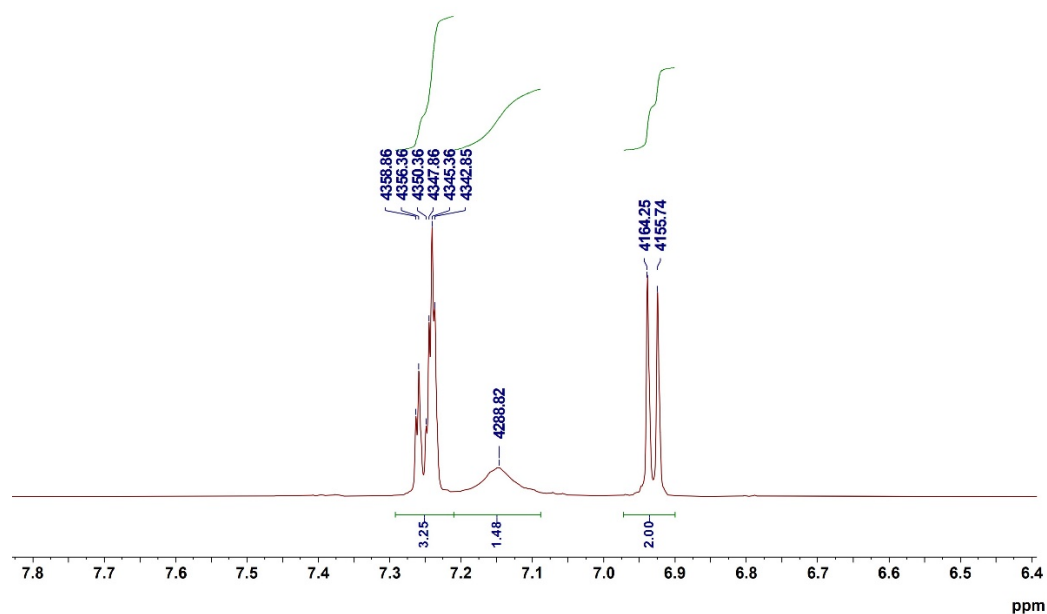

**Figure S7.** Close up view of the <sup>1</sup>H NMR spectrum of compound **1b** (ACN-*d*<sub>3</sub>, 600 MHz).

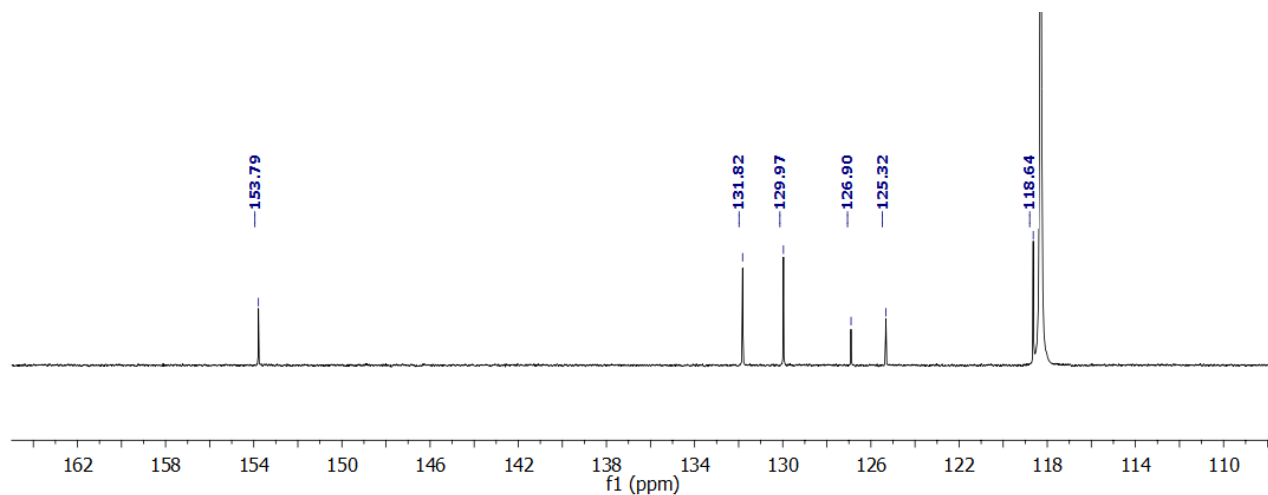

**Figure S8.** <sup>13</sup>C NMR spectrum of compound **1b** (ACN-*d*<sub>3</sub>, 100 MHz).

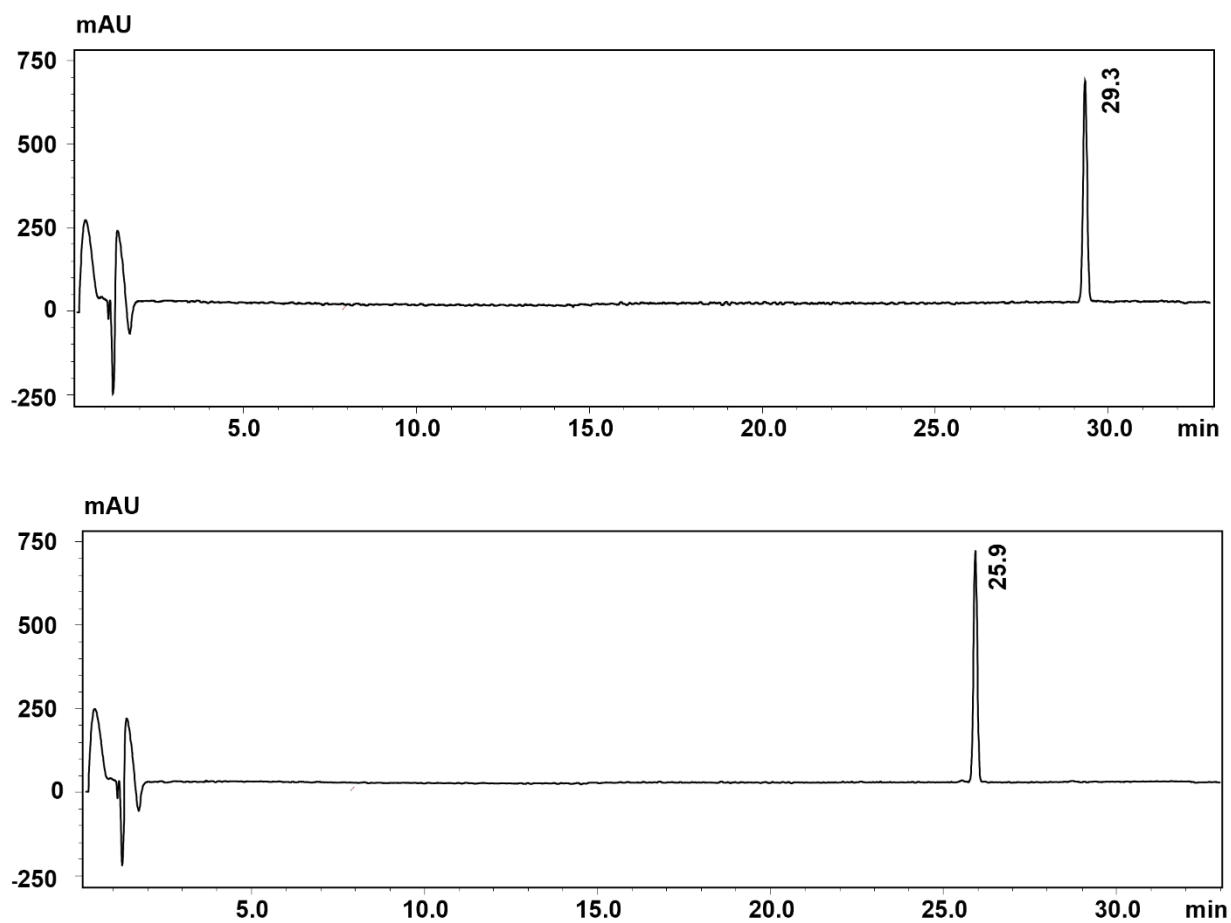

**Figure S9.** UHPLC runs of compounds **1a** (upper trace) and **1b** (lower trace).

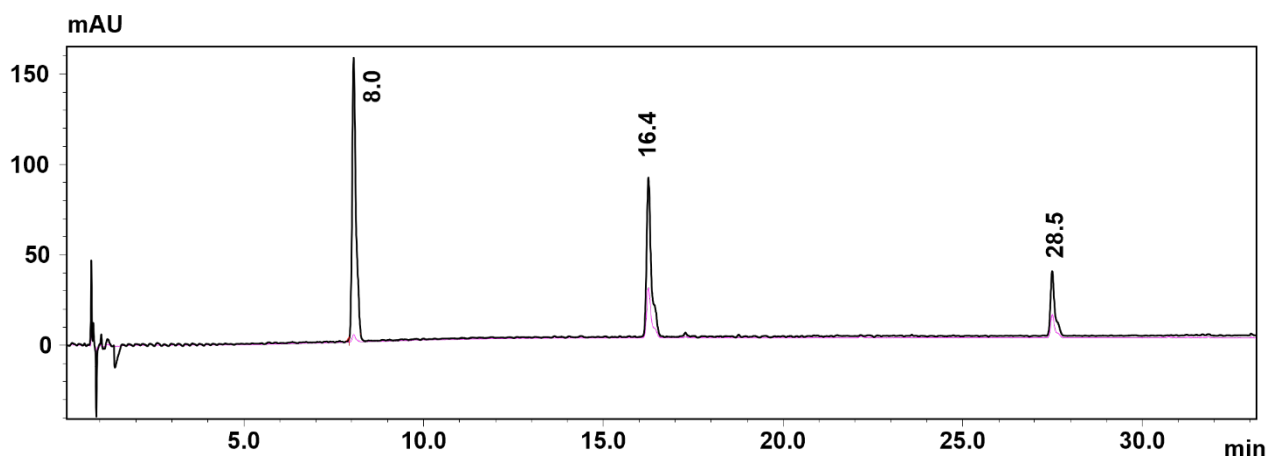

**Figure S10.** UHPLC traces (black line:  $\lambda = 220$  nm, pink line:  $\lambda = 240$  nm) of the Fe-MC6\*a-catalyzed oxidation of 4-BP 30 min after  $\text{H}_2\text{O}_2$  addition. The peak with  $R_t = 16.4$  min corresponds to 4-BP; the peak with  $R_t = 8.0$  min is MPS, used as internal standard. Reaction conditions:  $[\text{Fe-MC6}^*\text{a}] = 6.25 \times 10^{-6}$  M;  $[4\text{-BP}] = 2.5$  mM;  $[\text{H}_2\text{O}_2] = 2.5$  mM; phosphate buffer (50 mM) at pH 6.5 with 50% TFE (v/v).

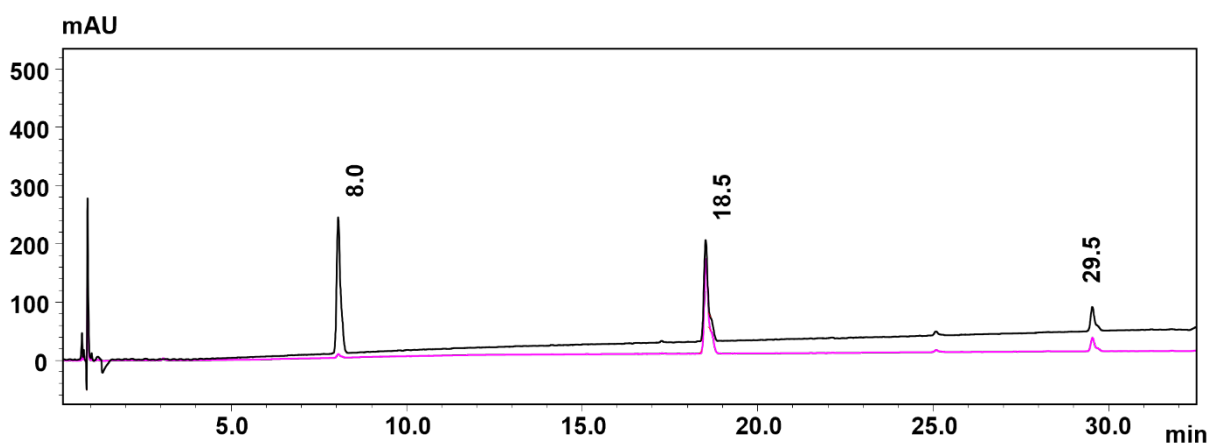

**Figure S11.** UHPLC traces (black line:  $\lambda = 220$  nm, pink line:  $\lambda = 240$  nm) of the Fe-MC6\*a-catalyzed oxidation of 4-IP 30 min after  $\text{H}_2\text{O}_2$  addition. The peak with  $R_t = 18.5$  min corresponds to 4-iodophenol; the peak with  $R_t = 8.0$  min is MPS, used as internal standard. The peak with  $R_t = 29.5$  min corresponds to 4-IP dimer, as determined by LC-MS analysis. Reaction conditions:  $[\text{Fe-MC6}^*\text{a}] = 6.25 \times 10^{-6}$  M;  $[4\text{-IP}] = 2.5$  mM;  $[\text{H}_2\text{O}_2] = 2.5$  mM; phosphate buffer (50 mM) at pH 6.5 with 50% TFE (v/v).

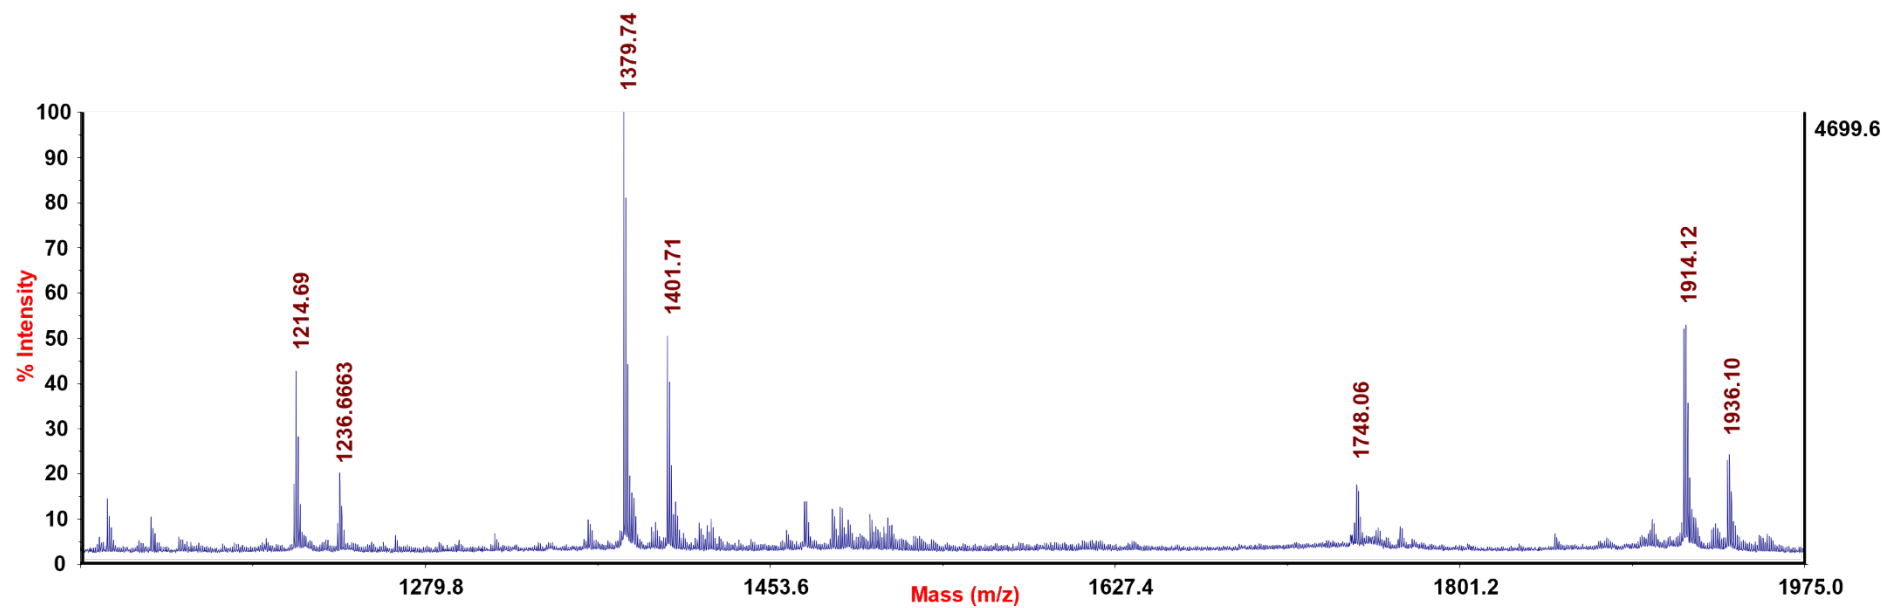

**Figure S12.** Close up view of the MALDI-MS spectrum of the insoluble material formed during the course of the Fe-MC6\*a-catalyzed 4-CP oxidation.

a)

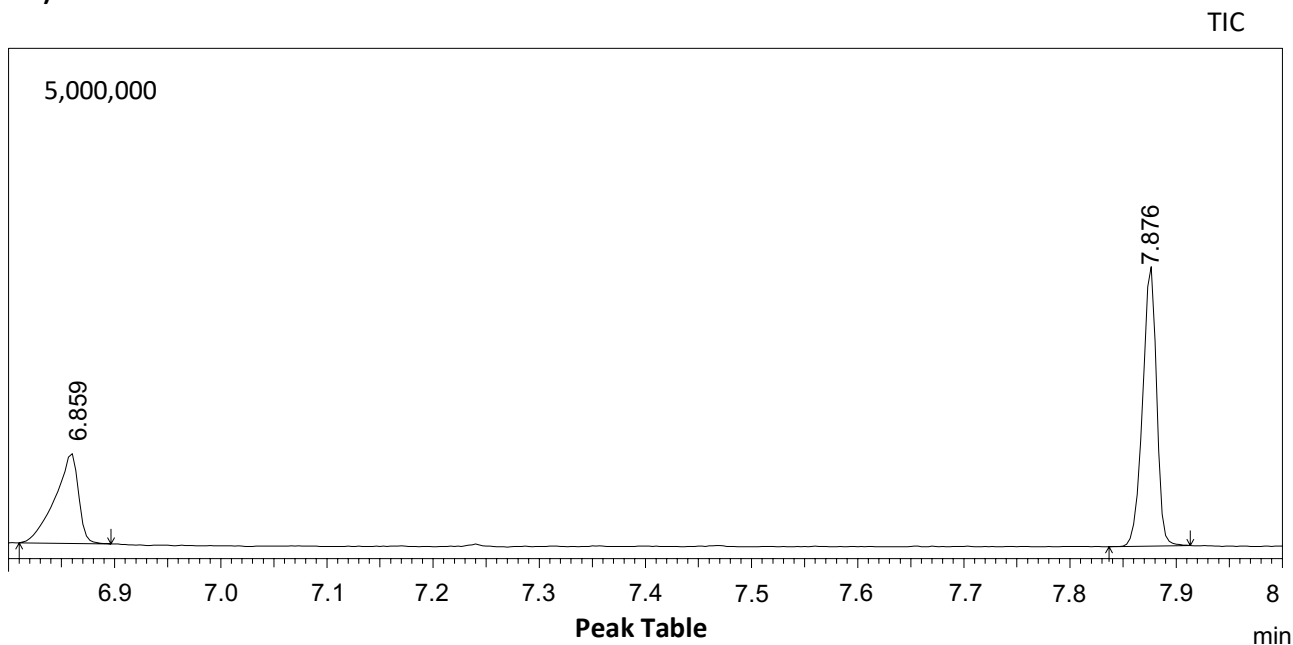

b)

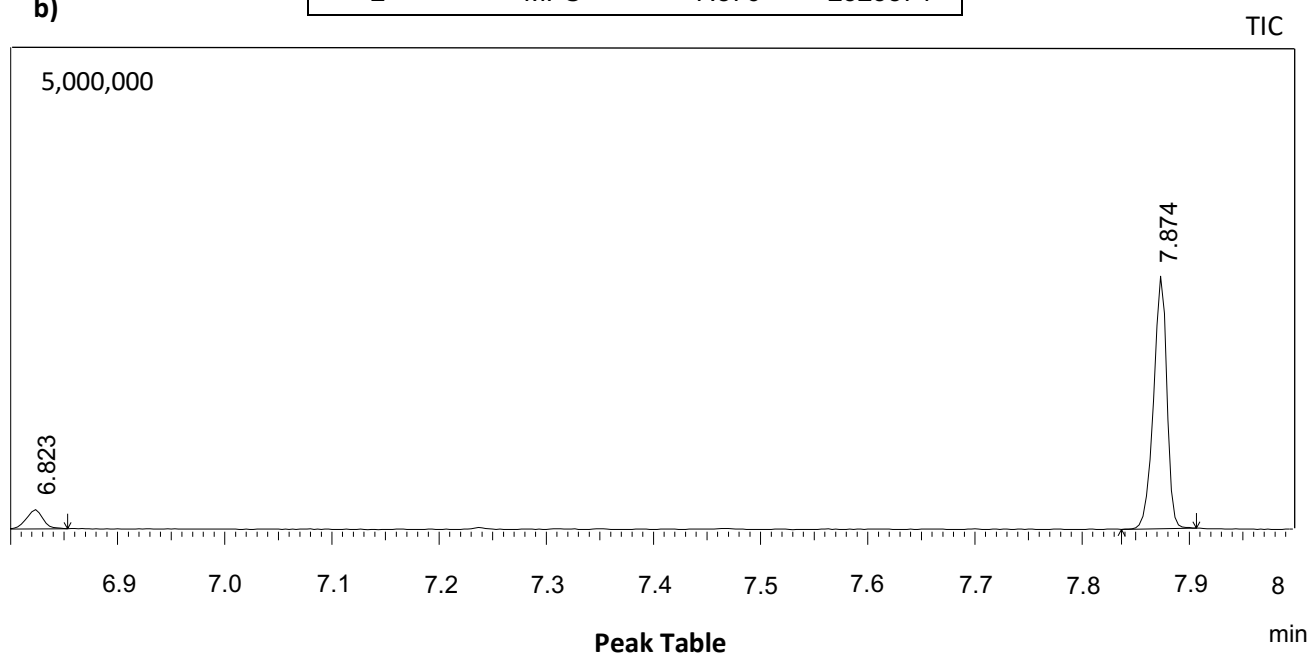

**Figure S13.** GC-MS analysis of the FeMC6\*a-catalyzed 4-CP oxidation (a) before and (b) 30 min after H<sub>2</sub>O<sub>2</sub> addition. *Reaction conditions:* [Fe-MC6\*a] = 1.0 x 10<sup>-3</sup> mM; [4-CP] = 2.5 mM; [H<sub>2</sub>O<sub>2</sub>] = 2.5 mM; [MPS] = 2.5 mM; phosphate buffer (50 mM) at pH 6.5 with 50% TFE (v/v).

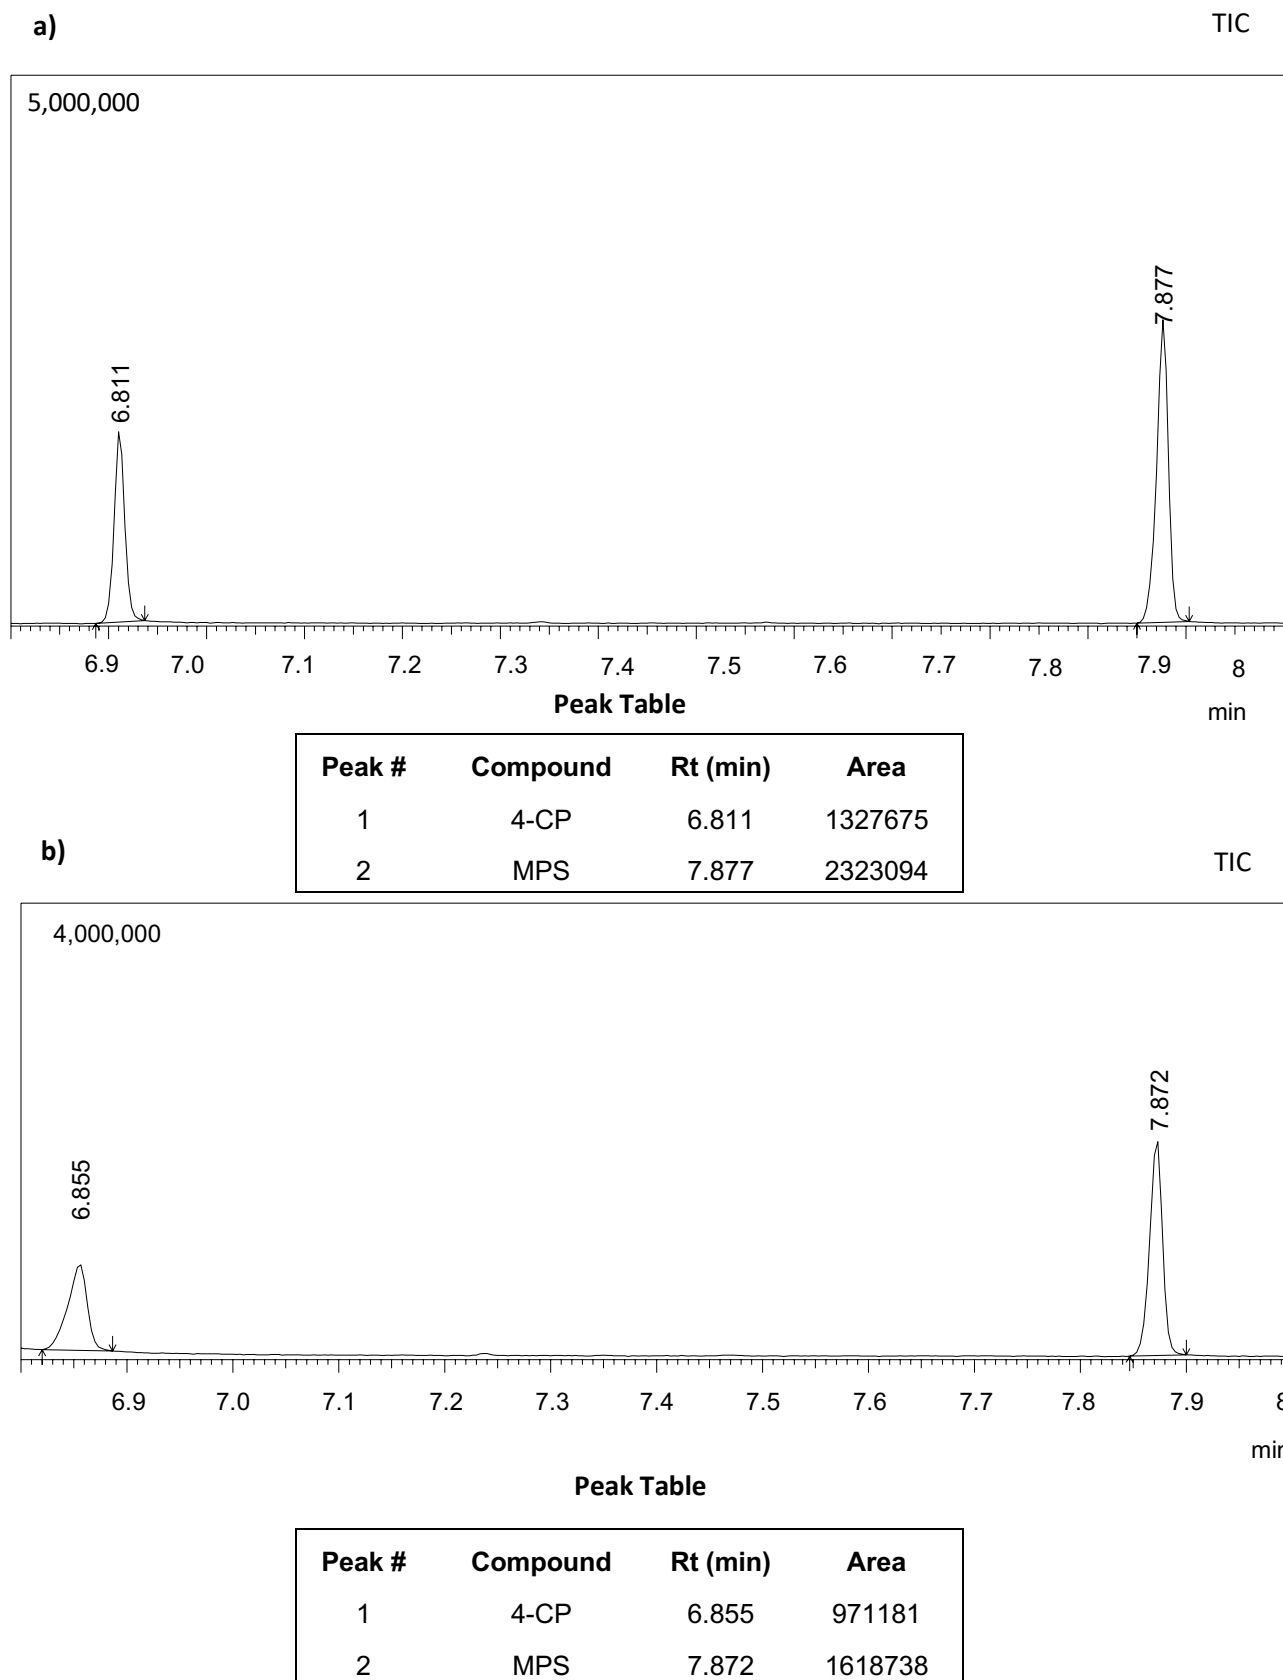

**Figure S14.** GC-MS analysis of the FeMC6\*a-catalyzed 4-CP oxidation (a) before and (b) 30 min after sequential H<sub>2</sub>O<sub>2</sub> and DMPO additions. *Reaction conditions:* [Fe-MC6\*a] = 1.0 x 10<sup>-3</sup> mM; [4-CP] = 2.5 mM; [H<sub>2</sub>O<sub>2</sub>] = 2.5 mM; [MPS] = 2.5 mM; [DMPO] = 125 mM; phosphate buffer (50 mM) at pH 6.5 with 50% TFE (v/v).
